# Supplementary material
Source: PubMed Central journal article supplement (PMC3911079)
Supplement: AEM.01885-13_zam999105036so1.pdf [file AEM.01885-13_zam999105036so1.pdf]

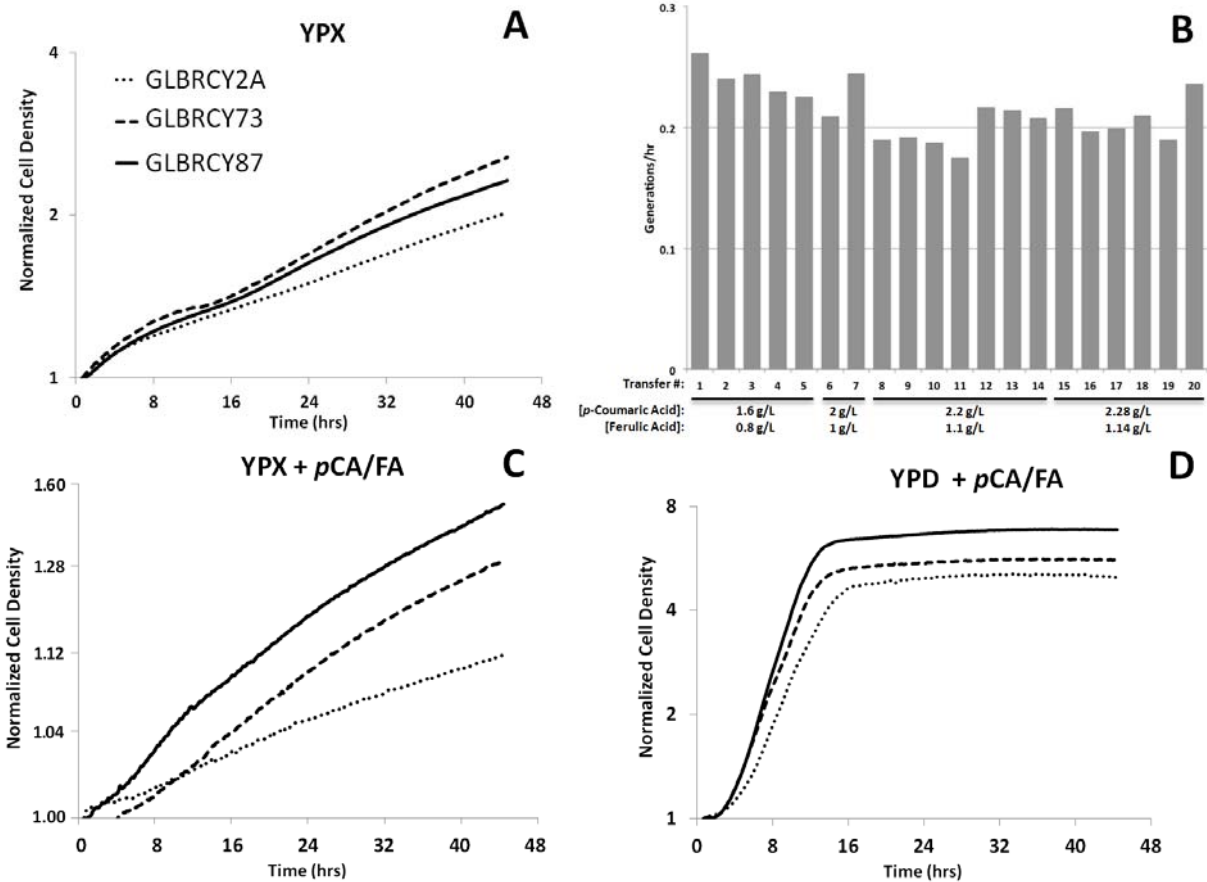

**Supplementary FIG S1.** Representative growth profiles of engineered and evolved GLBRCY0 strains in various media conditions. Engineered GLBRCY2A and evolved GLBRCY73 and GLBRCY87 strains were inoculated in 96-well plates containing (A) YPX, (C) YPX + 2.4 g/L *pCA* + 1.2 g/L FA or (D) YPD + 2.4 g/L *pCA* + 1.2 g/L FA media, and cell densities monitored for 48 h. Adaptation of the GLBRCY73 strain in YPX with the indicated inhibitor concentrations (B). The bar graph indicates the growth rate in the number of cell generations per h of the GLBRCY73 strain during each serial transfer.
